# Supplementary material for: Development of Optimal Tilt Angle Models of a Photovoltaic Module for Maximum Power Production: Ethiopia
Source: Hindawi journal article supplement (doi:10.1155/2022/8729570), 2022-08-08
Supplement: f1 [file 8729570.f1.docx]

**Graphical Abstract**
